# Supplementary material for: Reduced levels of two modifiers of epigenetic gene silencing, Dnmt3a and Trim28, cause increased phenotypic noise
Source: PubMed Central journal article supplement (PMC3156950; doi:10.1186/gb-2010-11-11-r111), 2010-11-19

**A**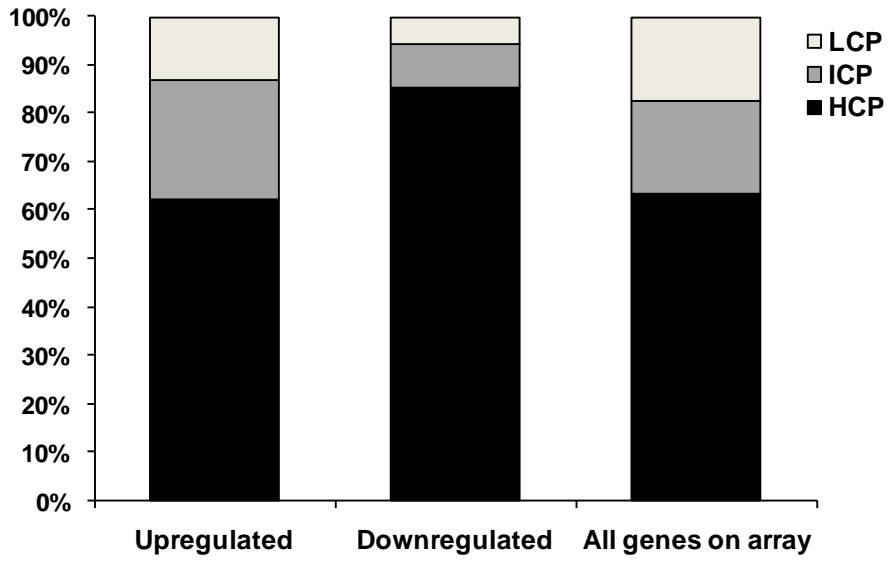**B**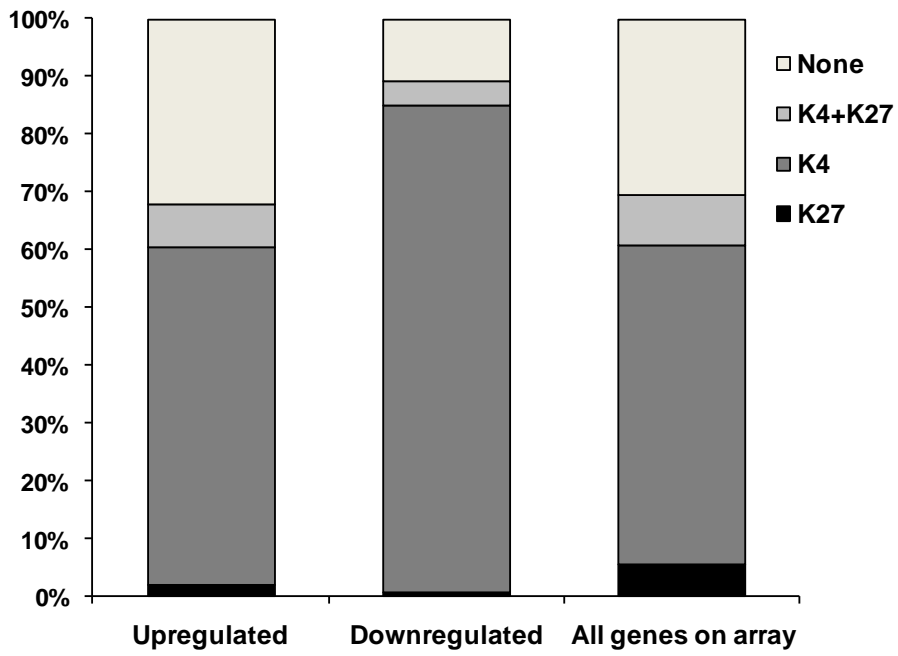

Supplement: gb-2010-11-11-r111-S3.pdf [file gb-2010-11-11-r111-S3.pdf]
